# Supplementary material
Source: PubMed Central journal article supplement (PMC7452046)
Supplement: mmc2.pdf [file mmc2.pdf]

## Supporting Information for

### Original article

#### Analysis on herbal medicines utilized for treatment of COVID-19

Lu Luo<sup>a</sup>, Jingwen Jiang<sup>b</sup>, Cheng Wang<sup>c</sup>, Martin Fitzgerald<sup>d</sup>, Weifeng Hu<sup>e</sup>, Yumei Zhou<sup>f</sup>, Hui Zhang<sup>g</sup>, Shilin Chen<sup>a,\*</sup>

<sup>a</sup>*Institute of Chinese Materia Medica, China Academy of Chinese Medical Sciences, Beijing 100700, China*

<sup>b</sup>*West China Biomedical Big Data Center, West China Hospital, Sichuan University, Chengdu 610041, China*

<sup>c</sup>*Institute of Basic Medical Sciences, Chinese Academy of Medical Sciences & Peking Union Medical College, Beijing 100006, China*

<sup>d</sup>*Ashdale Clinic, Cork T12 T2VK, Ireland*

<sup>e</sup>*The Third Clinical Medical College, Zhejiang Chinese Medical University, Hangzhou 310000, China*

<sup>f</sup>*The Fourth Clinical Medical College of Guangzhou University of Chinese Medicine, Guangzhou 518033, China*

<sup>g</sup>*Akupunktur Akademiet, Aabyhoej 8230, Denmark*

Received 30 March 2020; received in revised form 29 April 2020; accepted 9 May 2020

\*Corresponding author. Tel: +86 10 64032658, fax: +86 10 64013996.

E-mail address: slchen@icmm.ac.cn (Shilin Chen).

## Table of contents

|                                                                                                                                        |    |
|----------------------------------------------------------------------------------------------------------------------------------------|----|
| <b>Table S1</b> List of 99 classic formulas utilized for COVID-19 with ingredients, and frequency .....                                | 3  |
| <b>Table S2</b> Top ten most frequently used herbal formulas in COVID-19 treatment .....                                               | 6  |
| <b>Table S3.1</b> List of 179 herbs and corresponding properties.....                                                                  | 7  |
| <b>Table S3.2</b> Frequency of therapeutic effects of 179 herbs ( $n=179$ ).....                                                       | 10 |
| <b>Table S3.3</b> Frequency of medicinal properties of 179 herbs ( $n=179$ ).....                                                      | 11 |
| <b>Table S4</b> Frequency of therapeutic effects in five medicinal properties.....                                                     | 11 |
| <b>Table S5.1</b> Top ten most frequently utilized individual herbs in COVID-19 treatment.....                                         | 12 |
| <b>Table S5.2</b> Information of the representative chemical components of top ten most frequently utilized herbs.....                 | 12 |
| <b>Table S6.1</b> Eight groups of core combinations of herbs by hierarchical clustering.....                                           | 13 |
| <b>Table S6.2</b> Twelve groups of core combinations of chemical components by hierarchical clustering .                               | 14 |
| <b>Table S7</b> Ten new formulas developed by unsupervised hierarchical clustering .....                                               | 15 |
| <b>Table S8</b> List of eight clusters and corresponding active pharmacophores .....                                                   | 16 |
| <b>Table S9</b> Number of 22 chemical structures .....                                                                                 | 16 |
| <b>Figure S1</b> Heat map of the frequency of top 10 frequently appeared chemical components in top 20 frequently utilized herbs ..... | 18 |

**Table S1** List of 99 classic formulas utilized for COVID-19 with ingredients, and frequency.

| Classic herbal formula      | Ingredient                                                                                                                                                                                                                                                                                                                            | Frequency |
|-----------------------------|---------------------------------------------------------------------------------------------------------------------------------------------------------------------------------------------------------------------------------------------------------------------------------------------------------------------------------------|-----------|
| Newly developed formula     |                                                                                                                                                                                                                                                                                                                                       | 55        |
| An Gong Niu Huang Pill      | Curcumae radix, Coptidis rhizoma, Gardeniae fructus, Scutellariae radix                                                                                                                                                                                                                                                               | 21        |
| Ma Xing Shi Gan Decoction   | Forsythiae fructus, Armeniacae semen amarum, Glycyrrhizae radix et rhizoma                                                                                                                                                                                                                                                            | 18        |
| Xuan Bai Cheng Qi Decoction | Armeniacae semen amarum, Trichosanthis fructus, Rhei radix et rhizoma                                                                                                                                                                                                                                                                 | 13        |
| Xie Bi Jing Injection       | Carthamus tinctorius, Paeoniae radix rubra, Chuanxiong rhizoma, Salviae miltiorrhizae radix et rhizoma, Angelicae sinensis radix                                                                                                                                                                                                      | 13        |
| Yin Qiao Powder             | Forsythiae fructus, Lonicerae japonicae Flos, Platycodonis radix, Menthae haplocalycis herba, Lophatheri herba, Glycyrrhizae radix et rhizoma, Schizonepetae herba, Sojae semen praeparatum, Arctii fructus                                                                                                                           | 13        |
| Huo Po Xia Ling Decoction   | Pogostemon cablin, Pinelliae rhizoma, Poria, Armeniacae semen amarum, Coicis semen, Amomi fructus rotundus, Tetrapanacis medulia, Polyporus, Sojae semen praeparatum, Alismatis rhizoma, Magnoliae officinalis cortex                                                                                                                 | 12        |
| Lian Hua Qing Wen Granule   | Forsythiae fructus, Lonicerae japonicae Flos, Forsythiae fructus, Armeniacae semen amarum, Isatidis radix, Cyrtomium fortunei, Houத்துyniae herba, Pogostemon cablin, Rhei radix et rhizoma, Rhodiola crenulatae radix et rhizoma, Menthae haplocalycis herba, Glycyrrhizae radix et rhizoma                                          | 12        |
| Huo Xiang Zheng Qi Powder   | Areca catechu, Angelicae dahuricae radix, Perillae fructus, Poria, Pinelliae rhizoma, Atractylodis macrocephalae rhizoma, Citri reticulatae pericarpium, Magnoliae officinalis cortex, Zingiberis rhizoma recens, Platycodonis radix, Pogostemon cablin, Glycyrrhizae radix et rhizoma                                                | 11        |
| Sheng Jiang Powder          | Curcumae longae rhizoma, Rhei radix et rhizoma                                                                                                                                                                                                                                                                                        | 11        |
| Shu he Xiang Pill           | Liquidambar, Benzoinum, Aucklandiae radix, Cyperi rhizoma, Santalum album, Caryophylli Flos, Aquilariae lignum resinatum, Piperis longi fructus, Olibanum, Atractylodis macrocephalae rhizoma, Chebulae fructus                                                                                                                       | 11        |
| Zi Xue Pill                 | Aucklandiae radix, Aquilariae lignum resinatum, Scrophulariae radix, Cimicifugae rhizoma, Glycyrrhizae radix et rhizoma, Caryophylli Flos                                                                                                                                                                                             | 10        |
| Cen Fu Injection            | Ginseng radix et rhizoma rubra, Aconiti lateralis radix praeparata                                                                                                                                                                                                                                                                    | 9         |
| Da Yuan Decoction           | Arecae semen, Magnoliae officinalis cortex, Tsaoko fructus, Anemarrhenae rhizoma, Paeoniae radix alba, Scutellariae radix, Glycyrrhizae radix et rhizoma                                                                                                                                                                              | 9         |
| Jie She Huo Xie Decoction   | Forsythiae fructus, Puerariae lobatae radix, Bupleuri radix, Angelicae sinensis radix, Rehmanniae radix, Paeoniae radix rubra, Persicae semen, Carthamus tinctorius, Aurantii fructus, Glycyrrhizae radix et rhizoma                                                                                                                  | 8         |
| Ma Xing Yi Gan Decoction    | Forsythiae fructus, Armeniacae semen amarum, Glycyrrhizae radix et rhizoma, Coicis semen                                                                                                                                                                                                                                              | 8         |
| Huang Lian Jie Du Decoction | Coptidis rhizoma, Scutellariae radix, Phellodendri chinensis cortex, Gardeniae fructus                                                                                                                                                                                                                                                | 7         |
| Jin Hua Qing Gan Granule    | Lonicerae japonicae Flos, Fritillariae thunbergii bulbus, Scutellariae radix, Arctii fructus, Artemisiae annuae herba                                                                                                                                                                                                                 | 7         |
| Qing Wen Bai Du Decoction   | Rehmanniae radix, Coptidis rhizoma, Gardeniae fructus, Platycodonis radix, Scutellariae radix, Anemarrhenae rhizoma, Paeoniae radix rubra, Scrophulariae radix, Forsythiae fructus, Glycyrrhizae radix et rhizoma, Moutan cortex, Lophatheri herba                                                                                    | 7         |
| Si Ni Jia Ren Cen Decoction | Glycyrrhizae radix et rhizoma, Aconiti lateralis radix praeparata, Zingiberis rhizoma recens, Ginseng radix et rhizoma                                                                                                                                                                                                                | 7         |
| Fang Feng Tong Sheng Pill   | Saposhnikoviae radix, Schizonepetae herba, Menthae haplocalycis herba, Forsythiae fructus, Rhei radix et rhizoma, Gardeniae fructus, Platycodonis radix, Chuanxiong rhizoma, Angelicae sinensis radix, Scutellariae radix, Forsythiae fructus, Glycyrrhizae radix et rhizoma, Atractylodis macrocephalae rhizoma, Paeoniae radix alba | 6         |
| Gan Lu Xiao Du Pill         | Scutellariae radix, Artemisiae scopariae herba, Acori tatarinowii rhizoma, Fritillariae cirrhosae bulbus, Akebiae caulis, Pogostemon cablin, Forsythiae fructus, Amomi fructus rotundus, Menthae haplocalycis herba, Belamcandae rhizoma                                                                                              | 6         |
| Qing Kai Ling Syrup         | Scutellariae radix, Gardeniae fructus, Isatidis radix, Lonicerae japonicae Flos                                                                                                                                                                                                                                                       | 6         |
| Sheng Mai Injection         | Ginseng radix et rhizoma rubra, Ophiopogonis radix, Schisandrae chinensis fructus                                                                                                                                                                                                                                                     | 6         |
| Shu Feng Jie Du Granule     | Polygoni cuspidati rhizoma et radix, Forsythiae fructus, Isatidis radix, Bupleuri radix, Patrinia scabiosifolia, Verbenae herba, Phragmitis rhizoma, Glycyrrhizae radix et rhizoma                                                                                                                                                    | 5         |
| Tan Re Qing Injection       | Scutellariae radix, Lonicerae japonicae Flos, Forsythiae fructus                                                                                                                                                                                                                                                                      | 5         |
| Xiao Chai Hu Decoction      | Bupleuri radix, Scutellariae radix, Ginseng radix et rhizoma, Pinelliae rhizoma, Glycyrrhizae radix et rhizoma, Zingiberis rhizoma recens, Jujubae fructus                                                                                                                                                                            | 5         |
| Cen Fu Decoction            | Ginseng radix et rhizoma, Aconiti lateralis radix praeparata                                                                                                                                                                                                                                                                          | 4         |
| Wang Ren Decoction          | Armeniacae semen amarum, Tetrapanacis medulia, Amomi fructus rotundus, Lophatheri herba, Magnoliae officinalis cortex, Coicis semen, Pinelliae rhizoma                                                                                                                                                                                | 4         |
| Xi Yan Ping Injection       | Andrographis paniculata                                                                                                                                                                                                                                                                                                               | 4         |
| Yu Ping Feng Powder         | Saposhnikoviae radix, Astragali radix, Atractylodis macrocephalae rhizoma                                                                                                                                                                                                                                                             | 4         |
| Zhu Ye Shi Gao Decoction    | Lophatheri herba, Pinelliae rhizoma, Ginseng radix et rhizoma, Ophiopogonis radix, Glycyrrhizae radix et rhizoma, Oryza sativa                                                                                                                                                                                                        | 4         |
| Bai Hu Decoction            | Anemarrhenae rhizoma, Oryza sativa, Glycyrrhizae radix et rhizoma                                                                                                                                                                                                                                                                     | 3         |

|                                   |                                                                                                                                                                                                                                                                                                                                                                                                                                                  |   |
|-----------------------------------|--------------------------------------------------------------------------------------------------------------------------------------------------------------------------------------------------------------------------------------------------------------------------------------------------------------------------------------------------------------------------------------------------------------------------------------------------|---|
| Cen Fu Long Mu Li Decoction       | Ginseng radix et rhizoma, Aconiti lateralis radix praeparata, Zingiberis rhizoma recens, Jujubae fructus                                                                                                                                                                                                                                                                                                                                         | 3 |
| Da Qing Long Decoction            | Forsythiae fructus, Cinnamomi ramulus, Glycyrrhizae radix et rhizoma, Armeniacae semen amarum, Zingiberis rhizoma recens, Jujubae fructus                                                                                                                                                                                                                                                                                                        | 3 |
| Jing Fang Bai Du Powder           | Notopterygii rhizoma et radix, Radix angelicae biseratae, Bupleuri radix, Peucedani radix, Aurantii fructus, Poria, Schizonepetae herba, Saposhnikoviae radix, Platycodonis radix, Chuanxiong rhizoma, Glycyrrhizae radix et rhizoma                                                                                                                                                                                                             | 3 |
| Qian Jin Wei Jing Decoction       | Phragmitis rhizoma, Benincasae semen, Coicis semen, Persicae semen                                                                                                                                                                                                                                                                                                                                                                               | 3 |
| Sang Bei Powder                   | Mori cortex, Fritillariae cirrhosae bulbus                                                                                                                                                                                                                                                                                                                                                                                                       | 3 |
| Sheng Mai Decoction               | Ginseng radix et rhizoma, Ophiopogonis radix, Schisandrae chinensis fructus                                                                                                                                                                                                                                                                                                                                                                      | 3 |
| Xiang Sha Liu Jun Zi Decoction    | Ginseng radix et rhizoma, Atractylodis macrocephalae rhizoma, Poria, Glycyrrhizae radix et rhizoma, Citri reticulatae pericarpium, Pinelliae rhizoma, Amomi fructus, Aucklandiae radix, Zingiberis rhizoma recens                                                                                                                                                                                                                                | 3 |
| Cen Qin Bai Shu Powder            | Nelumbinis semen, Coicis semen, Amomi fructus, Platycodonis radix, Lablab semen album, Poria, Ginseng radix et rhizoma, Glycyrrhizae radix et rhizoma, Atractylodis macrocephalae rhizoma, Dioscoreae rhizoma                                                                                                                                                                                                                                    | 2 |
| Cen Mai Decoction                 | Panacis quinquefolii radix, Schisandrae chinensis fructus, Ophiopogonis radix                                                                                                                                                                                                                                                                                                                                                                    | 2 |
| Er Chen Decoction                 | Pinelliae rhizoma, Citri exocarpium rubrum, Poria, Glycyrrhizae radix et rhizoma                                                                                                                                                                                                                                                                                                                                                                 | 2 |
| Gui Zhi Decoction                 | Cinnamomi ramulus, Paeoniae radix alba, Zingiberis rhizoma recens, Jujubae fructus, Glycyrrhizae radix et rhizoma                                                                                                                                                                                                                                                                                                                                | 2 |
| Anti-virus Syrup                  | Isatidis radix, Phragmitis rhizoma, Rehmanniae radix, Curcumae radix, Anemarrhenae rhizoma, Acori tatarinowii rhizoma, Pogostemon cablin, Forsythiae fructus                                                                                                                                                                                                                                                                                     | 2 |
| Long Dan Xie Gan Decoction        | Gentianae radix et rhizoma, Gardeniae fructus, Scutellariae radix, Alismatis rhizoma, Plantaginis semen, Akebiae caulis, Rehmanniae radix, Angelicae sinensis radix, Bupleuri radix, Glycyrrhizae radix et rhizoma                                                                                                                                                                                                                               | 2 |
| Qing Fei Pai Du Decoction         | Forsythiae fructus, Glycyrrhizae radix et rhizoma, Armeniacae semen amarum, Cinnamomi ramulus, Alismatis rhizoma, Polyporus, Atractylodis macrocephalae rhizoma, Poria, Bupleuri radix, Scutellariae radix, Pinelliae rhizoma, Zingiberis rhizoma recens, Asteris radix et rhizoma, Farfarae Flos, Belamcandae rhizoma, Asari radix et rhizoma, Dioscoreae rhizoma, Aurantii fructus immaturus, Citri reticulatae pericarpium, Pogostemon cablin | 2 |
| Qing Qi Hua Tan Decoction         | Citri reticulatae pericarpium, Armeniacae semen amarum, Aurantii fructus immaturus, Scutellariae radix, Trichosanthis fructus, Poria, Pinelliae rhizoma                                                                                                                                                                                                                                                                                          | 2 |
| Qing Ying Decoction               | Rehmanniae radix, Scrophulariae radix, Lophatheri herba, Ophiopogonis radix, Salviae miltiorrhizae radix et rhizoma, Coptidis rhizoma, Lonicerae japonicae Flos, Forsythiae fructus                                                                                                                                                                                                                                                              | 2 |
| Re Du Ning Injection              | Artemisiae annuae herba, Lonicerae japonicae Flos, Gardeniae fructus                                                                                                                                                                                                                                                                                                                                                                             | 2 |
| Ren Cen Bai Du Powder             | Ginseng radix et rhizoma, Bupleuri radix, Platycodonis radix, Glycyrrhizae radix et rhizoma, Poria, Aurantii fructus, Notopterygii rhizoma et radix, Radix angelicae biseratae, Peucedani radix, Chuanxiong rhizoma                                                                                                                                                                                                                              | 2 |
| Sang Ju Decoction                 | Mori folium, Chrysanthemi Flos, Armeniacae semen amarum, Forsythiae fructus, Menthae haplocalycis herba, Platycodonis radix, Glycyrrhizae radix et rhizoma, Phragmitis rhizoma                                                                                                                                                                                                                                                                   | 2 |
| Sha Cen Mai Dong Decoction        | Glehniae radix, Polygonati odorati rhizoma, Glycyrrhizae radix et rhizoma, Mori folium, Ophiopogonis radix, Lablab semen album, Trichosanthis radix                                                                                                                                                                                                                                                                                              | 2 |
| Sheng Mai Decoction               | Codonopsis radix, Ophiopogonis radix, Schisandrae chinensis fructus                                                                                                                                                                                                                                                                                                                                                                              | 2 |
| Si Jun Zi Decoction               | Ginseng radix et rhizoma, Atractylodis macrocephalae rhizoma, Poria, Glycyrrhizae radix et rhizoma                                                                                                                                                                                                                                                                                                                                               | 2 |
| Wang Shi Qing Shu Yi Qi Decoction | Panacis quinquefolii radix, Dendrobii caulis, Ophiopogonis radix, Coptidis rhizoma, Lophatheri herba, Nymphaea tetragona, Anemarrhenae rhizoma, Glycyrrhizae radix et rhizoma, Oryza sativa, Trichosanthis fructus                                                                                                                                                                                                                               | 2 |
| Xiao Xian Xiong Decoction         | Coptidis rhizoma, Pinelliae rhizoma, Trichosanthis fructus                                                                                                                                                                                                                                                                                                                                                                                       | 2 |
| Zhi Bao Pill                      | Benzoinum                                                                                                                                                                                                                                                                                                                                                                                                                                        | 2 |
| Bu Zhong Yi Qi Pill               | Astragali radix, Codonopsis radix, Atractylodis macrocephalae rhizoma, Angelicae sinensis radix, Cimicifugae rhizoma, Bupleuri radix, Citri reticulatae pericarpium, Glycyrrhizae radix et rhizoma                                                                                                                                                                                                                                               | 1 |
| Cen Mai Injection                 | Ginseng radix et rhizoma rubra, Ophiopogonis radix                                                                                                                                                                                                                                                                                                                                                                                               | 1 |
| Chai Ge Jie Ji Decoction          | Bupleuri radix, Puerariae lobatae radix, Glycyrrhizae radix et rhizoma, Scutellariae radix, Notopterygii rhizoma et radix, Angelicae dahuricae radix, Paeoniae radix alba, Platycodonis radix, Jujubae fructus, Zingiberis rhizoma recens                                                                                                                                                                                                        | 1 |
| Chai Hu Xian Xiong Decoction      | Bupleuri radix, Pinelliae rhizoma, Coptidis rhizoma, Platycodonis radix, Scutellariae radix, Trichosanthis fructus, Aurantii fructus immaturus, Zingiberis rhizoma recens                                                                                                                                                                                                                                                                        | 1 |
| Fu Fang Jin Yin Hua Granule       | Lonicerae japonicae Flos, Forsythiae fructus, Scutellariae radix                                                                                                                                                                                                                                                                                                                                                                                 | 1 |
| Fu Fang Qin Syrup                 | Lonicerae japonicae Flos, Scutellariae radix, Forsythiae fructus, Isatidis radix                                                                                                                                                                                                                                                                                                                                                                 | 1 |
| Gui Zhi Fu Ling Pill              | Cinnamomi ramulus, Poria, Moutan cortex, Paeoniae radix rubra, Persicae semen                                                                                                                                                                                                                                                                                                                                                                    | 1 |
| Hao Ling Qing Dan Decoction       | Artemisiae annuae herba, Bambusae caulis in taenias, Pinelliae rhizoma, Poria, Scutellariae radix, Aurantii fructus, Citri reticulatae pericarpium, Glycyrrhizae radix et rhizoma, Indigo naturalis                                                                                                                                                                                                                                              | 1 |
| Huang Shi Liu Jun Zi Decoction    | Ginseng radix et rhizoma, Atractylodis macrocephalae rhizoma, Poria, Glycyrrhizae radix et rhizoma, Pinelliae rhizoma, Citri reticulatae pericarpium, Astragali radix, Dioscoreae rhizoma                                                                                                                                                                                                                                                        | 1 |
| Jin Shi Qing Wen Jie Du Syrup     | Anemarrhenae rhizoma, Lonicerae japonicae Flos, Forsythiae fructus, Paridis rhizoma, Platycodonis radix, Aurantii fructus, Fritillariae thunbergii bulbus, Bupleuri radix, Scutellariae radix, Schizonepetae herba, Arctii fructus, Coicis semen, Trichosanthis radix, Ophiopogonis radix, Paeoniae radix rubra, Glycyrrhizae radix et rhizoma                                                                                                   | 1 |
| Li Zhong Pill                     | Ginseng radix et rhizoma, Zingiberis rhizoma recens, Glycyrrhizae radix et rhizoma, Atractylodis macrocephalae rhizoma                                                                                                                                                                                                                                                                                                                           | 1 |

|                                           |                                                                                                                                                                                                                                                                                                                                  |     |
|-------------------------------------------|----------------------------------------------------------------------------------------------------------------------------------------------------------------------------------------------------------------------------------------------------------------------------------------------------------------------------------|-----|
| Lian Pu Decoction                         | Magnoliae officinalis cortex, Coptidis rhizoma, Acori tatarinowii rhizoma, Pinelliae rhizoma, Sojae semen praeparatum, Gardeniae fructus, Phragmitis rhizoma                                                                                                                                                                     | 1   |
| Lian Qiao Bai Du Powder                   | Schizonepetae herba, Saposhnikoviae radix, Bupleuri radix, Peucedani radix, Scutellariae radix, Platycodonis radix, Arctii fructus, Lonicerae japonicae Flos, Fritillariae cirrhosae bulbus, Forsythiae fructus, Aurantii fructus, Poria, Chuanxiong rhizoma, Glycyrrhizae radix et rhizoma                                      | 1   |
| Ma Huang Lian Qiao Chi Xiao Dou Decoction | Forsythiae fructus, Forsythiae fructus, Armeniacae semen amarum, Vignae semen, Jujubae fructus, Mori cortex, Zingiberis rhizoma recens, Glycyrrhizae radix et rhizoma                                                                                                                                                            | 1   |
| Ma Xing Yin Qiao Powder                   | Forsythiae fructus, Armeniacae semen amarum, Glycyrrhizae radix et rhizoma, Forsythiae fructus, Lonicerae japonicae Flos, Platycodonis radix, Menthae haplocalycis herba, Lophatheri herba, Glycyrrhizae radix et rhizoma, Schizonepetae herba, Sojae semen praeparatum, Arctii fructus                                          | 1   |
| Mai Wei Bu Zhong Yi Qi Decoction          | Pseudostellariae radix, Ophiopogonis radix, Schisandrae chinensis fructus, Astragali radix, Glycyrrhizae radix et rhizoma, Ginseng radix et rhizoma, Angelicae sinensis radix, Citri reticulatae pericarpium, Cimicifugae rhizoma, Bupleuri radix, Atractylodis macrocephalae rhizoma,                                           | 1   |
| Pu Di Lan Qiao Du Pill                    | Taraxaci herba, Scutellariae radix, Corydalis Bungeanae Herba, Isatidis radix                                                                                                                                                                                                                                                    | 1   |
| Qi Wei Decoction                          | Bupleuri radix, Magnoliae officinalis cortex, Glycyrrhizae radix et rhizoma, Cinnamomi ramulus, Forsythiae fructus, Citri reticulatae pericarpium, Pinelliae rhizoma                                                                                                                                                             | 1   |
| Qiang Huo Sheng Shi Decoction             | Notopterygii rhizoma et radix, Radix angelicae biseratae, Artemisia rupestris, Saposhnikoviae radix, Glycyrrhizae radix et rhizoma, Vitis fructus, Chuanxiong rhizoma                                                                                                                                                            | 1   |
| Qing Re Jie Du Granule                    | Lonicerae japonicae Flos, Forsythiae fructus, Isatidis folium, Coptidis rhizoma, Rehmanniae radix, Anemarrhenae rhizoma, Scrophulariae radix                                                                                                                                                                                     | 1   |
| Qing Zao Jiu Fei Decoction                | Mori folium, Ginseng radix et rhizoma, Glycyrrhizae radix et rhizoma, Helicteres angustifolia, Ophiopogonis radix, Eriobotryae folium, Armeniacae semen amarum                                                                                                                                                                   | 1   |
| Ren Cen Bai Hu Decoction                  | Anemarrhenae rhizoma, Glycyrrhizae radix et rhizoma, Oryza sativa, Ginseng radix et rhizoma                                                                                                                                                                                                                                      | 1   |
| San Shi Decoction                         | Armeniacae semen amarum, Bambusae caulis in taenias, Tetrapanacis medulia, Lonicerae japonicae Flos                                                                                                                                                                                                                              | 1   |
| Sang Bei Zhi Ke Powder                    | Mori cortex, Fritillariae thunbergii bulbus, Platycodonis radix, Schizonepetae herba, Asteris radix et rhizoma, Stemonae radix, Cynanchum glaucescens, Glycyrrhizae radix et rhizoma, Citri reticulatae pericarpium                                                                                                              | 1   |
| Shen Gan Ma Huang Decoction               | Belamcandae rhizoma, Forsythiae fructus, Zingiberis rhizoma recens, Asari radix et rhizoma, Asteris radix et rhizoma, Farfarae Flos, Schisandrae chinensis fructus, Jujubae fructus, Pinelliae rhizoma                                                                                                                           | 1   |
| Shen Shu Powder                           | Atractylodis rhizoma, Citri reticulatae pericarpium, Magnoliae officinalis cortex, Glycyrrhizae radix et rhizoma, Pogostemon cablin, Amomi fructus                                                                                                                                                                               | 1   |
| Sheng Yang Yi Wei Decoction               | Astragali radix, Pinelliae rhizoma, Ginseng radix et rhizoma, Glycyrrhizae radix et rhizoma, Radix angelicae biseratae, Saposhnikoviae radix, Paeoniae radix alba, Notopterygii rhizoma et radix, Citri reticulatae pericarpium, Poria, Bupleuri radix, Alismatis rhizoma, Atractylodis macrocephalae rhizoma, Coptidis rhizoma  | 1   |
| Shuang Huang Lian Syrup                   | Lonicerae japonicae Flos, Scutellariae radix, Forsythiae fructus                                                                                                                                                                                                                                                                 | 1   |
| Ting Li Xie Fei Decoction                 | Descurainiae semen lepidii semen, Trichosanthis fructus, Fagopyri dibotryis rhizoma, Tripirospermum chinense, Scutellariae radix, Perillae fructus, Allium macrostemon, Pinelliae rhizoma, Cinnamomi ramulus, Paeoniae radix alba, Chuanxiong rhizoma, Sinapis semen                                                             | 1   |
| Tong Xuan Li Fei Pill                     | Perillae folium, Peucedani radix, Platycodonis radix, Armeniacae semen amarum, Forsythiae fructus, Glycyrrhizae radix et rhizoma, Citri reticulatae pericarpium, Pinelliae rhizoma, Poria, Aurantii fructus, Scutellariae radix                                                                                                  | 1   |
| Wu Ling Powder                            | Polyporus, Poria, Atractylodis macrocephalae rhizoma, Alismatis rhizoma, Cinnamomi ramulus                                                                                                                                                                                                                                       | 1   |
| Wu Ye Lu Gen Decoction                    | Pogostemon cablin, Menthae haplocalycis herba, Nelumbinis folium, Eriobotryae folium, Eupatorii herba, Phragmitis rhizoma, Benincasae semen                                                                                                                                                                                      | 1   |
| Xi Jiao Di Huang Decoction                | Rehmanniae radix, Paeoniae radix alba, Moutan cortex                                                                                                                                                                                                                                                                             | 1   |
| Xin Xue Granule                           | Andrographis paniculata, Polygonati odorati rhizoma, Cimicifugae rhizoma, Aquilariae lignum resinatum, Gardeniae fructus                                                                                                                                                                                                         | 1   |
| Xing Nao Jing Injection                   | Curcumae radix, Gardeniae fructus                                                                                                                                                                                                                                                                                                | 1   |
| Yin Huang Qing Fei Capsule                | Descurainiae semen lepidii semen, Forsythiae fructus, Armeniacae semen amarum, Fritillariae thunbergii bulbus, Eriobotryae folium, Isatidis folium, Acori tatarinowii rhizoma, Dioscorea nipponica, Artemisia rupestris, Ginkgo folium, Schisandrae chinensis fructus, Aurantii fructus immaturus, Glycyrrhizae radix et rhizoma | 1   |
| Yin Lian Qing Wen Jie Du Syrup            | Not published                                                                                                                                                                                                                                                                                                                    | 1   |
| Yin Qiao Bai Du Powder                    | Lonicerae japonicae Flos, Lasiosphaera calvatia, Puerariae lobatae radix, Arctii fructus, Forsythiae fructus, Isatidis radix                                                                                                                                                                                                     | 1   |
| Yin Qiao Ma Bo Powder                     | Forsythiae fructus, Arctii fructus, Lonicerae japonicae Flos, Belamcandae rhizoma, Lasiosphaera calvatia                                                                                                                                                                                                                         | 1   |
| Zhen Qi Fu Zheng Pill                     | Astragali radix, Ligustri lucidi fructus                                                                                                                                                                                                                                                                                         | 1   |
| Zhi Shu Powder                            | Platycodonis radix, Schizonepetae herba, Asteris radix et rhizoma, Stemonae radix, Cynanchum glaucescens, Glycyrrhizae radix et rhizoma, Citri reticulatae pericarpium                                                                                                                                                           | 1   |
| Tong Shi Wu Han Anti-epidemic Formula     | Not published                                                                                                                                                                                                                                                                                                                    | 1   |
| Total                                     |                                                                                                                                                                                                                                                                                                                                  | 423 |

**Table S2** Top ten most frequently used herbal formulas in COVID-19 treatment.

| Frequency | Clinic stage                        | Syndrome differentiation                  | Symptom                                                                                                                                                                                                                      | Treatment principle                                                                                   | Formula                                                                                                         | Herbal ingredient                                                                                                                                                                                                                                                                                               |
|-----------|-------------------------------------|-------------------------------------------|------------------------------------------------------------------------------------------------------------------------------------------------------------------------------------------------------------------------------|-------------------------------------------------------------------------------------------------------|-----------------------------------------------------------------------------------------------------------------|-----------------------------------------------------------------------------------------------------------------------------------------------------------------------------------------------------------------------------------------------------------------------------------------------------------------|
| 25        | Critical stage                      | Internal blockage and external detachment | Dizziness, irritability, hot chest and abdomen, cold hands and feet, shortness of breath or need of auxiliary ventilation. The tongue is red and crimson, with yellow or dry coating. The pulse is rapid, broad or rootless. | Open the orifices, dissolve the phlegm, and heat-toxin, tonify Qi and nourish Yin                     | An Gong Niu Huang Pill                                                                                          | Curcumae radix, Coptidis rhizoma, Gardeniae fructus, and Scutellariae radix                                                                                                                                                                                                                                     |
| 13        |                                     |                                           |                                                                                                                                                                                                                              | Clear away the heat, dissolve the phlegm, invigorate the Qi and Yang, and open the orifices           | Zi Xue Powder                                                                                                   | Aucklandiae radix, Aquilariae lignum resinatum, Scrophulariae radix, Cimicifugae rhizoma, Glycyrrhizae radix et rhizoma, and Caryophylli flos                                                                                                                                                                   |
| 11        |                                     |                                           |                                                                                                                                                                                                                              | Dissolve the dampness, open the orifices, invigorate the Qi and nourish Yin                           | Su He Xiang Pill                                                                                                | Liquidambar, Benzoinum, Aucklandiae radix, Cyperi rhizoma, Santalum album, Caryophylli flos, Aquilariae lignum resinatum, Piperis longi fructus, Olibanum, Atractylodis macrocephalae rhizoma, and Chebulae fructus                                                                                             |
| 18        | Mild, moderate, and critical stages | Heat-toxin obstructing the lung           | High fever, cough, yellow or thick phlegm, fatigue, headache, aching, dry and bitter mouth, vexation, constipation, red urine, red tongue, yellow and greasy coating, slippery and rapid pulse                               | Clear away the heat, remove the toxin, disperse the lung Qi and expel the external pathogenic factors | Modification of Ephedra, Apricot Kernel, Gypsum and Licorice Decoction (Ma Huang Xing Ren Gan Cao Shi Gao Tang) | Ephedrae herba, Armeniacae semen amarum, and Glycyrrhizae radix et rhizoma                                                                                                                                                                                                                                      |
| 13        | Moderate and critical stages        | Heat-toxin congesting the lung            | Fever, cough, yellow thick sputum, chest distention, asthma, thirst, foul breath, abdominal distention and constipation, dark red tongue, thick fur and yellow turbid fur, slippery or tight pulse                           | Clear away the heat, disperse lung Qi, promote bowel movement to remove the heat                      | Xuan Bai Cheng Qi Decoction                                                                                     | Armeniacae semen amarum, Trichosanthis fructus, and Rhei radix et rhizoma                                                                                                                                                                                                                                       |
| 13        |                                     |                                           |                                                                                                                                                                                                                              | Clear away the heat, dissolve the phlegm, remove heat-toxin, tonify Qi, and nourish Yin               | Xue Bi Jing Decoction                                                                                           | Carthamus tinctorius, Paeoniae radix rubra, Chuanxiong rhizoma, and Salviae miltiorrhizae radix et rhizoma                                                                                                                                                                                                      |
| 13        | Mild stage                          | Heat-damp accumulating in the lung        | Fever, chills, sore throat, dry cough and less phlegm, aching limbs and muscles, fatigue, headache, red tongue edge, thin white or yellowish coating, floating pulse.                                                        | Expel the wind, relieve the exterior, and remove heat-toxin                                           | Yin Qiao Powder                                                                                                 | Forsythiae fructus, Lonicerae japonicae flos, Platycodonis radix, Menthae haplocalycis herba, Lophatheri herba, Glycyrrhizae radix et rhizoma, Schizonepetae herba, and Arctii fructus                                                                                                                          |
| 12        |                                     |                                           |                                                                                                                                                                                                                              | Dissolve the phlegm, remove the heat-toxin, regulate Qi and spleen                                    | Hou Po Xia Ling Decoction                                                                                       | Pogostemon cablin, Pogostemon cablin, Rubra Poria, Pinelliae rhizoma, Armeniacae semen amarum, Coicis semen, Amomi fructus rotundus, Tetrapanacis medulia, Polyporus, Schizonepetae herba, Alismatis rhizoma, and Magnoliae officinalis cortex                                                                  |
| 12        |                                     |                                           |                                                                                                                                                                                                                              | Clear the lung, relieve the exterior, invigorate Qi and dissolve the dampness                         | Lian Hua Qing Wen Decoction                                                                                     | Forsythiae fructus, Lonicerae japonicae flos, Ephedrae herba, Armeniacae semen amarum, Isatidis radix, Cyrtomium fortunei, Pogostemon cablin, Houttuyniae herba, Pogostemon cablin, Rhei radix et rhizoma, Rhodiolae crenulatae radix et rhizoma, Menthae haplocalycis herba, and Glycyrrhizae radix et rhizoma |
| 11        | Mild and moderate stage             | Heat-toxin obstructing the lung           | In the early stage of fever, dry cough, fatigue, stomach distention, aversion to cold, headache, nausea, sore throat, slightly dry mouth, light red tongue, thin, white and slightly greasy coating, tight or slow pulse.    | Dissolve the dampness, relieve the exterior, disperse lung Qi and clear the heat                      | Upbearing and Downbearing Powder (Sheng Jiang San)                                                              | Liquidambar, Benzoinum, Aucklandiae radix, Cyperi rhizoma, Santalum album, Caryophylli flos, Aquilariae lignum resinatum, Piperis longi fructus, Olibanum, Atractylodis macrocephalae rhizoma, and Chebulae fructus                                                                                             |

**Table S3.1** List of 179 herbs and corresponding properties.

| Herb CN     | Herb EN                                | Frequency | Therapeutic effect              | Medicinal property | Proportion (n=166) |
|-------------|----------------------------------------|-----------|---------------------------------|--------------------|--------------------|
| Gan Cao     | Glycyrrhizae radix et rhizoma          | 139       | Qi-tonic                        | Rhizoma & radix    | 83.73%             |
| Huang Qin   | Scutellariae radix                     | 101       | Heat-clearing                   | Rhizoma & radix    | 60.84%             |
| Ku Xing Ren | Armeniacaese semen amarum              | 87        | Expectorant & cough-suppressing | Fructus & semen    | 52.41%             |
| Jin Yin Hua | Lonicerae japonicae Flos               | 82        | Heat-clearing                   | Flos               | 49.40%             |
| Lian Qiao   | Forsythiae fructus                     | 81        | Heat-clearing                   | Fructus & semen    | 48.80%             |
| Ma Huang    | Ephedrae herba                         | 74        | Exterior-relieving              | Herba & others     | 44.58%             |
| Fu Ling     | Poria                                  | 65        | Dampness-resolving              | Herba & others     | 39.16%             |
| Guang Huo   |                                        |           |                                 |                    |                    |
| Xiang       | Pogostemon cablin                      | 63        | Dampness-resolving              | Herba & others     | 37.95%             |
| Chen Pi     | Citri reticulatae pericarpium          | 57        | Qi-regulating                   | folium & cortex    | 34.34%             |
| Jie Geng    | Platycodonis radix                     | 55        | Expectorant & cough-suppressing | Radix & rhizoma    | 33.13%             |
| Ban Xia     | Pinelliae rhizoma                      | 54        | Expectorant & cough-suppressing | Radix & rhizoma    | 32.53%             |
| Bai Zhu     | Atractylodis macrocephalae rhizoma     | 51        | Qi-tonic                        | Radix & rhizoma    | 30.72%             |
| Cang Zhu    | Atractylodis rhizoma                   | 50        | Dampness-resolving              | Radix & rhizoma    | 30.12%             |
| Da Huang    | Rhei radix et rhizoma                  | 48        | Heat-clearing                   | Radix & rhizoma    | 28.92%             |
| Zhi Zi      | Gardeniae fructus                      | 46        | Heat-clearing                   | Fructus & semen    | 27.71%             |
| Hou Po      | Magnoliae officinalis cortex           | 44        | Dampness-resolving              | folium & cortex    | 26.51%             |
| Mai Dong    | Ophiopogonis radix                     | 42        | Yin-nourishing                  | Radix & rhizoma    | 25.30%             |
| Huang Lian  | Coptidis rhizoma                       | 42        | Heat-clearing                   | Radix & rhizoma    | 25.30%             |
| Lu Gen      | Phragmitis rhizoma                     | 39        | Heat-clearing                   | Radix & rhizoma    | 23.49%             |
| Huang Qi    | Astragali radix                        | 38        | Qi-tonic                        | Radix & rhizoma    | 22.89%             |
| Bo He       | Menthae haplocalycis herba             | 36        | Exterior-relieving              | Herba & others     | 21.69%             |
| Ren Shen    | Ginseng radix et rhizoma               | 32        | Qi-tonic                        | Radix & rhizoma    | 19.28%             |
| Guan Zhong  | Cyrtomium fortunei                     | 31        | Heat-clearing                   | Radix & rhizoma    | 18.67%             |
| Yu Jin      | Curcuma radix                          | 30        | Blood-activating                | Radix & rhizoma    | 18.07%             |
| Chai Hu     | Bupleuri radix                         | 30        | Exterior-relieving              | Radix & rhizoma    | 18.07%             |
| Fu Zi       | Aconiti lateralis radix praeparata     | 29        | Interior-warming                | Radix & rhizoma    | 17.47%             |
| Chi Shao    | Paeoniae radix rubra                   | 29        | Heat-clearing                   | Radix & rhizoma    | 17.47%             |
| Zhi Mu      | Anemarrhenae rhizoma                   | 28        | Heat-clearing                   | Radix & rhizoma    | 16.87%             |
| Ban Lan Gen | Isatidis radix                         | 28        | Heat-clearing                   | Radix & rhizoma    | 16.87%             |
| Yi Yi Ren   | Coicis semen                           | 28        | Dampness-resolving              | Fructus & semen    | 16.87%             |
| Xuan Shen   | Scrophulariae radix                    | 27        | Heat-clearing                   | Fructus & semen    | 16.27%             |
| Gua Lou     | Trichosanthis fructus                  | 27        | Expectorant & cough-suppressing | Fructus & semen    | 16.27%             |
| Dan Zhu Ye  | Lophatheri herba                       | 28        | Heat-clearing                   | Herba & others     | 16.87%             |
| Ting Li Zi  | Descurainiae semen lepidii semen       | 26        | Expectorant & cough-suppressing | Fructus & semen    | 15.66%             |
| Niu Bang Zi | Arctii fructus                         | 26        | Exterior-relieving              | Fructus & semen    | 15.66%             |
| Fang Feng   | Saposhnikovia radix                    | 25        | Exterior-relieving              | Radix & rhizoma    | 15.06%             |
| Chuan Xiong | Chuanxiong rhizoma                     | 24        | Blood-activating                | Radix & rhizoma    | 14.46%             |
| Dang Gui    | Angelicae sinensis radix               | 23        | Blood-nourishing                | Radix & rhizoma    | 13.86%             |
| Chen Xiang  | Aquilariae lignum resinatum            | 23        | Qi-regulating                   | Herba & others     | 13.86%             |
| Cao Guo     | Tsaoko fructus                         | 23        | Dampness-resolving              | Fructus & semen    | 13.86%             |
| Ding Xiang  | Caryophylli Flos                       | 22        | Interior-warming                | Flos               | 13.25%             |
| Bing Lang   | Arecae semen                           | 22        | Insect repellent                | Fructus & semen    | 13.25%             |
| Zi Su Ye    | Perillae folium                        | 21        | Exterior-relieving              | folium & cortex    | 12.65%             |
| Zhe Bei Mu  | Fritillariae thunbergii bulbus         | 21        | Expectorant & cough-suppressing | Radix & rhizoma    | 12.65%             |
| Sheng Jiang | Zingiberis rhizoma recens              | 21        | Exterior-relieving              | Radix & rhizoma    | 12.65%             |
| Tao Ren     | Persicae semen                         | 20        | Blood-activating                | Fructus & semen    | 12.05%             |
| Dan Shen    | Salviae miltiorrhizae radix et rhizoma | 20        | Blood-activating                | Radix & rhizoma    | 12.05%             |
| Shan Zhu Yu | Corni fructus                          | 18        | Astringent                      | Fructus & semen    | 10.84%             |
| Hong Shen   | Ginseng radix et rhizoma rubra         | 18        | Qi-tonic                        | Radix & rhizoma    | 10.84%             |

|              |                                          |    |                                    |                 |        |
|--------------|------------------------------------------|----|------------------------------------|-----------------|--------|
| Dang Shen    | Codonopsis radix                         | 18 | Qi-tonic                           | Radix & rhizoma | 10.84% |
| Yu Xing Cao  | Houttuyniae herba                        | 17 | Heat-clearing                      | Herba & others  | 10.24% |
| Qing Hao     | Artemisiae annuae herba                  | 17 | Heat-clearing                      | Herba & others  | 10.24% |
| Jing Jie     | Schizonepetae herba                      | 17 | Exterior-relieving                 | Herba & others  | 10.24% |
| Dou Kou      | Amomi fructus rotundus                   | 18 | Dampness-resolving                 | Fructus & semen | 10.84% |
| Di Huang     | Rehmanniae radix                         | 17 | Blood-nourishing                   | Radix & rhizoma | 10.24% |
| Sang Bai Pi  | Mori cortex                              | 16 | Expectorant &<br>cough-suppressing | folium & cortex | 9.64%  |
| Mu Xiang     | Aucklandiae radix                        | 16 | Qi-regulating                      | Radix & rhizoma | 9.64%  |
| Bai Shao     | Paeoniae radix alba                      | 16 | Blood-nourishing                   | Radix & rhizoma | 9.64%  |
| Wu Wei Zi    | Schisandrae chinensis fructus            | 14 | Astringent                         | Fructus & semen | 8.43%  |
| Mu Dan Pi    | Moutan cortex                            | 14 | Heat-clearing                      | folium & cortex | 8.43%  |
| Bai Zhi      | Angelicae dahuricae radix                | 14 | Exterior-relieving                 | Radix & rhizoma | 8.43%  |
| An Xi Xiang  | Benzoinum                                | 14 | Resuscitation-inducing             | Herba & others  | 8.43%  |
| Sheng Ma     | Cimicifugae rhizoma                      | 13 | Exterior-relieving                 | Radix & rhizoma | 7.83%  |
| Sang Ye      | Mori folium                              | 13 | Exterior-relieving                 | folium & cortex | 7.83%  |
| Qiang Huo    | Notopterygii rhizoma et radix            | 13 | Exterior-relieving                 | Radix & rhizoma | 7.83%  |
| Hong Hua     | Carthamus tinctorius                     | 13 | Blood-activating                   | Flos            | 7.83%  |
| Xiang Fu     | Cyperii rhizoma                          | 12 | Qi-regulating                      | Radix & rhizoma | 7.23%  |
| Tan Xiang    | Santalum album                           | 12 | Qi-regulating                      | Herba & others  | 7.23%  |
| Su He Xiang  | Liquidambar                              | 12 | Resuscitation-inducing             | Herba & others  | 7.23%  |
| Ru Xiang     | Olibanum                                 | 12 | Blood-activating                   | Herba & others  | 7.23%  |
| Pei Lan      | Eupatorii herba                          | 12 | Dampness-resolving                 | Herba & others  | 7.23%  |
| Ke Zi        | Chebulae fructus                         | 12 | Astringent                         | Fructus & semen | 7.23%  |
| Bi Ba        | Piperis longi fructus                    | 12 | Interior-warming                   | Fructus & semen | 7.23%  |
| Tai Zi Shen  | Pseudostellariae radix                   | 11 | Qi-tonic                           | Radix & rhizoma | 6.63%  |
| Shi Chang Pu | Acori tatarinowii rhizoma                | 11 | Resuscitation-inducing             | Radix & rhizoma | 6.63%  |
| Sha Ren      | Amomi fructus                            | 11 | Dampness-resolving                 | Fructus & semen | 6.63%  |
| Hong Jing    | Rhodiolae crenulatae radix et<br>rhizoma | 11 | Qi-tonic                           | Radix & rhizoma | 6.63%  |
| Tian         | Belamcandae rhizoma                      | 10 | Heat-clearing                      | Radix & rhizoma | 6.02%  |
| Sheg An      | Cinnamomi ramulus                        | 10 | Exterior-relieving                 | Radix & rhizoma | 6.02%  |
| Gui Zhi      | Jujubae fructus                          | 10 | Qi-tonic                           | Radix & rhizoma | 6.02%  |
| Da Zao       | Glehniae radix                           | 10 | Yin-nourishing                     | Radix & rhizoma | 6.02%  |
| Bei Sha Shen | Polyporus                                | 10 | Dampness-resolving                 | Herba & others  | 6.02%  |
| Zhu Ling     | Aurantii fructus                         | 9  | Qi-regulating                      | Fructus & semen | 5.42%  |
| Zhi Ke       | Alismatis rhizoma                        | 10 | Dampness-resolving                 | Radix & rhizoma | 6.02%  |
| Ze Xie       | Panax quinquefolii radix                 | 9  | Qi-tonic                           | Radix & rhizoma | 5.42%  |
| Xi Yang      | Tetrapanax medulia                       | 10 | Dampness-resolving                 | Radix & rhizoma | 6.02%  |
| Shen         | Peucedani radix                          | 9  | Expectorant &<br>cough-suppressing | Radix & rhizoma | 5.42%  |
| Tong Cao     | Curcuma longae rhizoma                   | 10 | Blood-activating                   | Radix & rhizoma | 6.02%  |
| Qian Hu      | Areca catechu                            | 9  | Qi-regulating                      | folium & cortex | 5.42%  |
| Jiang Huang  | Sabia schumanniana                       | 8  | Qi-regulating                      | Radix & rhizoma | 4.82%  |
| Da Fu Pi     | Verbenae herba                           | 8  | Heat-clearing                      | Herba & others  | 4.82%  |
| Qing Mu      | Chrysanthemi Flos                        | 8  | Exterior-relieving                 | Flos            | 4.82%  |
| Xiang        | Sojae semen praeparatum                  | 12 | Exterior-relieving                 | Fructus & semen | 7.23%  |
| Ma Bian Cao  | Lablab semen album                       | 8  | Qi-tonic                           | Fructus & semen | 4.82%  |
| Ju Hua       | Aurantii fructus immaturus               | 7  | Qi-regulating                      | Fructus & semen | 4.22%  |
| Dan Dou Chi  | Polygoni cuspidati rhizoma et radix      | 7  | Dampness-resolving                 | Radix & rhizoma | 4.22%  |
| Bai Bian Dou | Isatidis folium                          | 7  | Heat-clearing                      | folium & cortex | 4.22%  |
| Zhi Shi      | Expectorant &<br>cough-suppressing       | 6  | Radix & rhizoma                    | 3.61%           |        |
| Hu Zhang     | Asteris radix et rhizoma                 | 6  | Radix & rhizoma                    | 3.61%           |        |
| Da Qing Ye   | Dioscoreae rhizoma                       | 6  | Qi-tonic                           | Radix & rhizoma | 3.61%  |
| Zi Wan       | Puerariae lobatae radix                  | 6  | Exterior-relieving                 | Radix & rhizoma | 3.61%  |
| Shan Yao     | Expectorant &<br>cough-suppressing       | 6  | Radix & rhizoma                    | 3.61%           |        |
| Ge Gen       | Fritillariae cirrhosae bulbos            | 6  | Radix & rhizoma                    | 3.61%           |        |
| Chuan Bei    | Dendrobii caulis                         | 5  | Yin-nourishing                     | Radix & rhizoma | 3.01%  |
| Mu           | Taraxaci herba                           | 5  | Heat-clearing                      | Herba & others  | 3.01%  |
| Shi Hu       | Eriobotryae folium                       | 5  | Expectorant &                      | folium & cortex | 3.01%  |
| Pu Gong      |                                          |    |                                    |                 |        |
| Ying         |                                          |    |                                    |                 |        |
| Pi Pa Ye     |                                          |    |                                    |                 |        |



|              |                                      | cough-suppressing |                                    |                 |       |
|--------------|--------------------------------------|-------------------|------------------------------------|-----------------|-------|
| Chuan Xin    |                                      |                   |                                    |                 |       |
| Lian         | Andrographis paniculata              | 5                 | Heat-clearing                      | Herba & others  | 3.01% |
| Bai Jiang    | Patrinia scabiosifolia               | 5                 | Heat-clearing                      | Herba & others  | 3.01% |
| Zhu Ru       | Bambusae caulis in taenias           | 4                 | Expectorant &<br>cough-suppressing | Radix & rhizoma | 2.41% |
| Yu Zhu       | Polygonati odorati rhizoma           | 4                 | Yin-nourishing                     | Radix & rhizoma | 2.41% |
| Yin Chen     | Artemisiae scopariae herba           | 4                 | Dampness-resolving                 | Herba & others  | 2.41% |
| Tian Hua Fen | Trichosanthis radix                  | 4                 | Heat-clearing                      | Radix & rhizoma | 2.41% |
| Tian Dong    | Asparagi radix                       | 4                 | Yin-nourishing                     | Radix & rhizoma | 2.41% |
| Shan Zha     | Crataegi fructus                     | 4                 | Digestant                          | Fructus & semen | 2.41% |
| Mu Tong      | Akebiae caulis                       | 4                 | Dampness-resolving                 | Radix & rhizoma | 2.41% |
| Mai Ya       | Hordei fructus germinatus            | 4                 | Digestant                          | Fructus & semen | 2.41% |
| Jing Mi      | Oryza sativa                         | 4                 | Yin-nourishing                     | Fructus & semen | 2.41% |
| Jin Qiao Mai | Fagopyri dibotryis rhizoma           | 4                 | Heat-clearing                      | Radix & rhizoma | 2.41% |
| Di Gu Pi     | Lycii cortex                         | 4                 | Heat-clearing                      | folium & cortex | 2.41% |
| Bai Mao Gen  | Imperatae rhizoma                    | 4                 | Hemostatics                        | Radix & rhizoma | 2.41% |
| Ai Di Cha    | Ardisiae japonicae herba             | 4                 | Expectorant &<br>cough-suppressing | Herba & others  | 2.41% |
| Xi Xin       | Asari radix et rhizoma               | 3                 | Exterior-relieving                 | Radix & rhizoma | 1.81% |
| Nan Sha      |                                      |                   |                                    |                 |       |
| Shen         | Adenophorae radix                    | 3                 | Yin-nourishing                     | Radix & rhizoma | 1.81% |
| Kuan Dong    |                                      |                   | Expectorant &<br>cough-suppressing |                 |       |
| Hua          | Farfarae Flos                        | 3                 |                                    | Flos            | 1.81% |
| Dong Gua Zi  | Benincasae semen                     | 3                 | Dampness-resolving                 | Fructus & semen | 1.81% |
| Bai He       | Lilii bulbus                         | 3                 | Yin-nourishing                     | folium & cortex | 1.81% |
| Bai Bu       | Stemonae radix                       | 3                 | Expectorant &<br>cough-suppressing | Radix & rhizoma | 1.81% |
| Bai Qian     | Cynanchum glaucescens                | 3                 | Expectorant &<br>cough-suppressing | Radix & rhizoma | 1.81% |
| Zi Su Zi     | Perillae fructus                     | 2                 | Expectorant &<br>cough-suppressing | Fructus & semen | 1.20% |
| Zi Su Geng   | Perillae caulis                      | 2                 | Exterior-relieving                 | Radix & rhizoma | 1.20% |
| Zi Cao       | Abnebiae radix                       | 2                 | Heat-clearing                      | Radix & rhizoma | 1.20% |
| Chong Lou    | Paridis rhizoma                      | 2                 | Heat-clearing                      | Radix & rhizoma | 1.20% |
| Yin Chai Hu  | Stellaria dichotoma                  | 1                 | Heat-clearing                      | Radix & rhizoma | 0.60% |
| Tu Fu Ling   | Smilar glabra                        | 2                 | Heat-clearing                      | Radix & rhizoma | 1.20% |
| San Qi       | Notoginseng radix et rhizoma         | 2                 | Hemostatics                        | Radix & rhizoma | 1.20% |
| Qing Guo     | Citri reticulatae pericarpium viride | 2                 | Heat-clearing                      | Fructus & semen | 1.20% |
| Nv Zhen Zi   | Ligustri lucidi fructus              | 2                 | Yin-nourishing                     | Fructus & semen | 1.20% |
| Ma Bo        | Lasiosphaera calvatia                | 2                 | Heat-clearing                      | Herba & others  | 1.20% |
| Lv Dou       | Vigna radiata                        | 2                 | Heat-clearing                      | Fructus & semen | 1.20% |
| Long Dan     | Gentianae radix et rhizoma           | 2                 | Heat-clearing                      | Radix & rhizoma | 1.20% |
| Lian Zi      | Nelumbinis semen                     | 2                 | Astringent                         | Fructus & semen | 1.20% |
| Ju Hong      | Citri exocarpium rubrum              | 2                 | Expectorant &<br>cough-suppressing | folium & cortex | 1.20% |
| Jin Lian Hua | Trollius chinensis                   | 2                 | Heat-clearing                      | Flos            | 1.20% |
| He Ye        | Nelumbinis folium                    | 2                 | Heat-clearing                      | folium & cortex | 1.20% |
| Gu Ya        | Setariae fructus germinatus          | 2                 | Digestant                          | Fructus & semen | 1.20% |
| Gou Qi Zi    | Lycii fructus                        | 2                 | Yin-nourishing                     | Fructus & semen | 1.20% |
| Gan Jiang    | Zingiberis rhizoma                   | 2                 | Interior-warming                   | Radix & rhizoma | 1.20% |
| Fu Xiao Mai  | Triticum aestivum                    | 2                 | Astringent                         | Fructus & semen | 1.20% |
| Du Huo       | Radix angelicae biseratae            | 2                 | Dampness-resolving                 | Radix & rhizoma | 1.20% |
| Chi Xiao Dou | Vignae semen                         | 2                 | Dampness-resolving                 | Fructus & semen | 1.20% |
| Che Qian Zi  | Plantaginis semen                    | 2                 | Dampness-resolving                 | Fructus & semen | 1.20% |
| Zi Hua Di    |                                      |                   |                                    |                 |       |
| Ding         | Viola philippica                     | 1                 | Heat-clearing                      | Herba & others  | 0.60% |
| Yuan Zhi     | Polygalae radix                      | 1                 | Sedative                           | Radix & rhizoma | 0.60% |
| Yu Mi Xu     | Maydis seigma                        | 1                 | Dampness-resolving                 | Flos            | 0.60% |
| Yin Xing Ye  | Ginkgo folium                        | 1                 | Expectorant &<br>cough-suppressing | folium & cortex | 0.60% |
| Yi Zhi Hao   | Artemisia rupestris                  | 1                 | Exterior-relieving                 | Herba & others  | 0.60% |

|              |                               |      |                    |                 |       |
|--------------|-------------------------------|------|--------------------|-----------------|-------|
| Xu Chang     |                               |      |                    |                 |       |
| Qing         | Cynanchum paniculatum         | 1    | Dampness-resolving | Radix & rhizoma | 0.60% |
| Xie Bai      | Allium macrostemon            | 1    | Qi-regulating      | Radix & rhizoma | 0.60% |
| Tian Zhu     |                               |      | Expectorant &      |                 |       |
| Huang        | Bambusae concretio silicea    | 1    | cough-suppressing  | Herba & others  | 0.60% |
| Suan Zao     |                               |      |                    |                 |       |
| Ren          | Ziziphi spinosae semen        | 1    | Sedative           | Fructus & semen | 0.60% |
| Su Mu        | Caesalpinia sappan            | 1    | Blood-activating   | Herba & others  | 0.60% |
| Shu Di       |                               |      |                    |                 |       |
| Huang        | Rehmanniae radix praeparata   | 1    | Blood-nourishing   | Radix & rhizoma | 0.60% |
| Qing Pi      | Citrus reticulata blanco      | 1    | Qi-regulating      | folium & cortex | 0.60% |
| Qing Dai     | Indigo naturalis              | 1    | Heat-clearing      | Radix & rhizoma | 0.60% |
|              |                               |      | Expectorant &      |                 |       |
| Pang Da Hai  | Scaphium wallichii            | 1    | cough-suppressing  | Fructus & semen | 0.60% |
| Ou Jie       | Nelumbinis rhizomatis nodus   | 1    | Hemostatics        | Radix & rhizoma | 0.60% |
| Mu Hu Die    | Oroxylum indicum              | 1    | Heat-clearing      | Fructus & semen | 0.60% |
| Man Jing Zi  | Vitidis fructus               | 1    | Exterior-relieving | Fructus & semen | 0.60% |
|              |                               |      | Expectorant &      |                 |       |
| Jie Zi       | Sinapis semen                 | 1    | cough-suppressing  | Fructus & semen | 0.60% |
| Huang Bai    | Phellodendri chinensis cortex | 1    | Heat-clearing      | folium & cortex | 0.60% |
| Shan Zhi Ma  | Helicteres angustifolia       | 1    | Heat-clearing      | Fructus & semen | 0.60% |
| He Geng      | Nymphaea tetragona            | 1    | Heat-clearing      | folium & cortex | 0.60% |
| Gou Teng     | Uncaria rhynchophylla         | 1    | Heat-clearing      | Radix & rhizoma | 0.60% |
| Gong Lao     |                               |      |                    |                 |       |
| Mu           | Mahoniae caulis               | 1    | Heat-clearing      | Radix & rhizoma | 0.60% |
| Fo Shou      | Citrus medica                 | 1    | Qi-regulating      | Fructus & semen | 0.60% |
| Fei Xing Cao | Tripierospermum chinense      | 1    | Heat-clearing      | Radix & rhizoma | 0.60% |
| Chuan Shan   |                               |      |                    |                 |       |
| Long         | Dioscorea nipponica           | 1    | Blood-activating   | Radix & rhizoma | 0.60% |
| Cha Shu Gen  | Camellia sinensis             | 1    | Heat-clearing      | Herba & others  | 0.60% |
| Ce Bai Ye    | Platycladi cacumen            | 1    | Hemostatics        | folium & cortex | 0.60% |
| Bu Zha Ye    | Microctis folium              | 1    | Heat-clearing      | folium & cortex | 0.60% |
| Ku Di Ding   | Corydalis Bungeanae Herba     | 1    | Heat-clearing      | Herba & others  | 0.60% |
| Total        |                               | 2760 |                    |                 |       |

**Table S3.2** Frequency of therapeutic effects of 179 herbs ( $n=179$ ).

| Therapeutic effect                | Number of herbs | Frequency |
|-----------------------------------|-----------------|-----------|
| Heat-clearing (antipyretic)       | 47              | 26.26%    |
| Expectorant and cough-suppressing | 22              | 12.29%    |
| Dampness-resolving                | 21              | 11.73%    |
| Exterior-relieving                | 20              | 11.17%    |
| Qi-tonic                          | 12              | 6.70%     |
| Qi-regulating                     | 12              | 6.70%     |
| Yin-tonic                         | 10              | 5.59%     |
| Blood-activating                  | 9               | 5.03%     |
| Astringent                        | 5               | 2.79%     |
| Interior-warming                  | 4               | 2.23%     |
| Hemostatics                       | 4               | 2.23%     |
| Blood-tonic                       | 4               | 2.23%     |
| Resuscitation-inducing            | 3               | 1.68%     |
| Digestant                         | 3               | 1.68%     |
| Sedative                          | 2               | 1.12%     |
| Insect repellent                  | 1               | 0.56%     |

**Table S3.3** Frequency of medicinal properties of 179 herbs ( $n=179$ ).

| Medicinal property | Number of herbs | Frequency |
|--------------------|-----------------|-----------|
| Radix & Rhizoma    | 83              | 46.37%    |
| Fructus & Semen    | 42              | 23.46%    |
| Herba & others     | 28              | 15.64%    |
| Folium & Cortex    | 19              | 10.61%    |
| Flos               | 7               | 3.91%     |

**Table S4** Frequency of therapeutic effects in five medicinal properties.

| Therapeutic effect              | Medicinal properties |                 |                 |                |                 | Total |
|---------------------------------|----------------------|-----------------|-----------------|----------------|-----------------|-------|
|                                 | Flos                 | Folium & Cortex | Fructus & Semen | Herba & others | Radix & Rhizoma |       |
| Astringent                      |                      |                 | 5               |                |                 | 5     |
| Blood-activating                | 1                    |                 | 1               | 2              | 5               | 9     |
| Blood-nourishing                |                      |                 |                 |                | 4               | 4     |
| Dampness-resolving              | 1                    | 1               | 7               | 5              | 7               | 21    |
| Digestant                       |                      |                 | 3               |                |                 | 3     |
| Expectorant & cough-suppressing | 1                    | 4               | 6               | 2              | 9               | 22    |
| Exterior-relieving              | 1                    | 2               | 3               | 4              | 10              | 20    |
| Heat-clearing                   | 2                    | 7               | 7               | 11             | 20              | 47    |
| Hemostatics                     |                      | 1               |                 |                | 3               | 4     |
| Insect repellent                |                      |                 | 1               |                |                 | 1     |
| Interior-warming                | 1                    |                 | 1               |                | 2               | 4     |
| Qi-regulating                   |                      | 3               | 3               | 2              | 4               | 12    |
| Qi-tonic                        |                      |                 | 1               |                | 11              | 12    |
| Resuscitation-inducing          |                      |                 |                 | 2              | 1               | 3     |
| Sedative                        |                      |                 | 1               |                | 1               | 2     |
| Yin-nourishing                  |                      | 1               | 3               |                | 6               | 10    |
| Total                           | 7                    | 19              | 42              | 28             | 83              | 179   |

**Table S5.1** Top ten most frequently utilized individual herbs in COVID-19 treatment.

| Herb                          | Frequency | Medicinal property | Natural property                  | Therapeutic effect              | Chief chemical component                                                                                                                                                                                 |
|-------------------------------|-----------|--------------------|-----------------------------------|---------------------------------|----------------------------------------------------------------------------------------------------------------------------------------------------------------------------------------------------------|
| Glycyrrhizae radix et rhizoma | 139       | Radix & Rhizoma    | Sweet and bland                   | Qi-tonic                        | Glycyrrhetic acid, glycyrrhizin, licoricidin, glabridin, glycyrrhiza polysaccharides, glutathione, isoangustone A, dehydroglyasperin C, licochalcone A,B,C,D,E, and liquiritigenin, etc.                 |
| Scutellariae radix            | 101       | Radix & Rhizoma    | Bitter and cold                   | Heat-clearing                   | Baicalein, phenyletha-noid glycosides, iridoid glycosides, diterpenes, triter-penoids, alkaloids, phytosterols, and polysaccharides, etc.                                                                |
| Armeniacaе semen amarum       | 87        | Fructus & Semen    | Bitter and slightly warm          | Expectorant & cough-suppressing | Amygdalin, etc.                                                                                                                                                                                          |
| Lonicerae japonicae flos      | 82        | Flos               | Pungent, slightly bitter and warm | Heat-clearing                   | Chlorogenic acid, flavonoids, iridoids, organic acids, saponins, chlorogenic acid, luteolin, loganin, loniceroside A, hexadecanoic acid, octadecadienoic acid, ethyl palmitate, and dihydrocarveol, etc. |
| Forsythiae fructus            | 81        | Fructus & Semen    | Sweet and bland                   | Heat-clearing                   | Forsythiaside, forsythin, and rutin, etc.                                                                                                                                                                |
| Ephedrae herba                | 74        | Herba & others     | Pungent and slightly warm         | Exterior-relieving              | Ephedrine, pseudophedrine, <i>N</i> -Methylephedrine, <i>N</i> -Methylpseudoephedrine, norephedrine, and norpseudophedrine. etc.                                                                         |
| Poria                         | 65        | Herba & others     | Bitter, pungent, and warm         | Dampness-resolving              | Pachymic acid, triterpenes, and polysaccharides, etc.                                                                                                                                                    |
| Pogostemon cablin             | 63        | Herba & others     | Pungent and slightly warm         | Dampness-resolving              | Patchouli alcohol                                                                                                                                                                                        |
| Citri reticulatae pericarpium | 57        | Folium & Cortex    | Bitter, pungent, and warm         | Qi-regulating                   | Hesperidin, alkaloids, flavonoids, and essential oils, etc.                                                                                                                                              |
| Platycodonis radix            | 55        | Radix & Rhizoma    | Bitter, pungent, and bland        | Expectorant & cough-suppressing | Platycodin D, platycodonate, polygalacic acid, flavonoids, polysaccharides, sterols, phenols, polyacetylenes, fatty acids, and essential oils, etc.                                                      |

**Table S5.2** Information of the representative chemical components of top ten most frequently utilized herbs.

| No. | Herbal medicine               | Representative component | chemical | Molecular weight (g/mol) | Molecular formula                                |
|-----|-------------------------------|--------------------------|----------|--------------------------|--------------------------------------------------|
| 1   | Glycyrrhizae radix et rhizoma | Glycyrrhetic acid        |          | 470.7                    | C <sub>30</sub> H <sub>46</sub> O <sub>4∞</sub>  |
| 2   | Scutellariae radix            | baicalein                |          | 270.24                   | C <sub>15</sub> H <sub>10</sub> O <sub>5</sub>   |
| 3   | Armeniacaе semen amarum       | Amygdalin                |          | 457.48                   | C <sub>20</sub> H <sub>27</sub> NO <sub>11</sub> |
| 4   | Lonicerae japonicae flos      | Chlorogenic acid         |          | 354.31                   | C <sub>16</sub> H <sub>18</sub> O <sub>9∞</sub>  |
| 5   | Forsythiae fructus            | Forsythiaside            |          | 624.65                   | C <sub>29</sub> H <sub>36</sub> O <sub>15∞</sub> |
| 6   | Ephedrae herba                | Ephedrine                |          | 165.23                   | C <sub>10</sub> H <sub>15</sub> NO <sub>∞</sub>  |
| 7   | Poria                         | pachymic acid            |          | 528.85                   | C <sub>33</sub> H <sub>52</sub> O <sub>5</sub>   |
| 8   | Pogostemon cablin             | Patchouli alcohol        |          | 222.37                   | C <sub>15</sub> H <sub>26</sub> O                |
| 9   | Citri reticulatae pericarpium | Hesperidin               |          | 610.62                   | C <sub>28</sub> H <sub>34</sub> O <sub>15</sub>  |
| 10  | Platycodonis radix            | Platycodin D             |          | 1,225.49                 | C <sub>57</sub> H <sub>92</sub> O <sub>28</sub>  |

**Table S6.1** Eight groups of core combinations of herbs by hierarchical clustering.

| Herb EN                               | Herb CN            | Herb EN                                   | Herb CN                   |
|---------------------------------------|--------------------|-------------------------------------------|---------------------------|
| Group One                             |                    | Tetrapanax medulia                        | Tong Cao                  |
| Aconiti lateralis radix<br>praeparata | Fu Zi              | Group Four                                |                           |
| Aquilariae lignum resinatum           | Chen Xiang         | Angelicae sinensis radix                  | Dang Gui                  |
| Caryophylli flos                      | Ding Xiang         | Carthamus tinctorius                      | Hong Hua                  |
| Cimicifugae rhizoma                   | Sheng Ma           | Chuanxiong rhizoma                        | Chuan<br>Xiong            |
| Coptidis rhizoma                      | Huang Lian         | Ginseng radix et rhizoma rubra            | Hong Shen                 |
| Corni fructus                         | Shan Zhu Yu        | Paeoniae radix rubra                      | Chi Shao                  |
| Curcumae radix                        | Yu Jin             | Salviae miltiorrhizae radix et<br>rhizoma | Dan Shen                  |
| Fritillariae cirrhosae bulbus         | Chuan Bei Mu       | Group Five                                |                           |
| Gardeniae fructus                     | Zhi Zi             | Arctii fructus                            | Niu Bang Zi               |
| Ginseng radix et rhizoma              | Ren Shen           | Armeniacae semen amarum                   | Ku Xing<br>Ren            |
| Sabia schumanniana                    | Qing Mu<br>Xiang   | Artemisiae annuae herba                   | Qing Hao                  |
| Scrophulariae radix                   | Xuan Shen          | Aurantii fructus                          | Zhi Ke                    |
| Scutellariae radix                    | Huang Qin          | Aurantii fructus immaturus                | Zhi Shi                   |
| Group Two                             |                    | Bupleuri radix                            | Chai Hu                   |
| Acori tatarinowii rhizoma             | Shi Chang Pu       | Cyrtomium fortunei                        | Guan Zhong                |
| Anemarrhenae rhizoma                  | Zhi Mu             | Descurainiae semen lepidii semen          | Ting Li Zi                |
| Moutan cortex                         | Mu Dan Pi          | Ephedrae herba                            | Ma Huang                  |
| Paeoniae radix alba                   | Bai Shao           | Eupatorii herba                           | Pei Lan                   |
| Panacis quinquefolii radix            | Xi Yang Shen       | Forsythiae fructus                        | Lian Qiao                 |
| Rehmanniae radix                      | Di Huang           | Fritillariae thunbergii bulbus            | Zhe Bei Mu                |
| Group Three                           |                    | Glycyrrhizae radix et rhizoma             | Gan Cao<br>Yu Xing<br>Cao |
| Alismatis rhizoma                     | Ze Xie             | Houttuyniae herba                         | Cao                       |
| Amomi fructus                         | Sha Ren            | Isatidis folium                           | Da Qing Ye                |
| Amomi fructus rotundus                | Dou Kou            | Isatidis radix                            | Ban Lan<br>Gen            |
| Angelicae dahuricae radix             | Bai Zhi            | Lonicerae japonicae flos                  | Jin Yin Hua               |
| Asteris radix et rhizoma              | Zi Wan             | Menthae haplocalycis herba                | Bo He                     |
| Belamcandae rhizoma                   | Sheng An           | Mori cortex                               | Sang Bai Pi               |
| Citri reticulatae pericarpium         | Chen Pi            | Persicae semen                            | Tao Ren                   |
| Coicis semen                          | Yi Yi Ren          | Peucedani radix                           | Qian Hu                   |
| Curcumae longae rhizoma               | Jiang Huang        | Phragmitis rhizoma                        | Lu Gen                    |
| Lablab semen album                    | Bai Bian Dou       | Platycodonis radix                        | Jie Geng                  |
| Lophatheri herba                      | Dan Zhu Ye         | Puerariae lobatae radix                   | Ge Gen                    |
| Magnoliae officinalis cortex          | Hou Po             | Rhei radix et rhizoma                     | Da Huang                  |
| Perillae folium                       | Zi Su Ye           | Rhodiolae crenulatae radix et<br>rhizoma  | Hong Jing<br>Tian         |
| Pinelliae rhizoma                     | Ban Xia            | Schizonepetae herba                       | Jing Jie                  |
| Pogostemon cablin                     | Guang Huo<br>Xiang | Trichosanthis fructus                     | Gua Lou                   |
| Polyporus                             | Zhu Ling           | Group Six                                 |                           |
| Poria                                 | Fu Ling            | Arecae semen                              | Bing Lang                 |
| Sojae semen praeparatum               | Dan Dou Chi        | Atractylodis rhizoma                      | Cang Zhu                  |

**Table S6.2** Twelve groups of core combinations of chemical components by hierarchical clustering.

| Label       | Molecule name                                                               | Label        | Molecule name                                                     |
|-------------|-----------------------------------------------------------------------------|--------------|-------------------------------------------------------------------|
| Group One   |                                                                             | C7_1         | 7-Methoxy-2-methyl isoflavone                                     |
| C1_1        | (-)-Catechin                                                                | C7_2         | Chrysanthemaxanthin                                               |
| C1_2        | (Z)-3-(4-Hydroxy-3-methoxy-phenyl)-N-[2-(4-hydroxyphenyl)ethyl]acrylamide   | C7_3         | Diop                                                              |
| C1_3        | Coumaroyltyramine                                                           | C7_4         | 11,14-Eicosadienoic acid                                          |
| C1_4        | (6Z,10E,14E,18E)-2,6,10,15,19,23-Hexamethyltetracos-2,6,10,14,18,22-hexaene | C7_5         | Formononetin                                                      |
| C1_5        | Digallate                                                                   | C7_6         | Glycyrol                                                          |
| C1_6        | <i>ent</i> -Epicatechin                                                     | C7_7         | Jaranol                                                           |
| C1_7        | Eriodyctiol (flavanone)                                                     | C7_8         | beta-Sitosterol                                                   |
| C1_8        | DNOP                                                                        | C7_9         | Ginsenoside rh2                                                   |
| C1_9        | Procyanidin B1                                                              | C7_10        | Malkangunin                                                       |
| C1_10       | Isopimaric acid                                                             | C7_11        | Sesamin                                                           |
| C1_11       | Resivit                                                                     | C7_12        | Sitosterol                                                        |
| C1_12       | Sugiol                                                                      | C7_13        | Stigmasterol                                                      |
| C1_13       | Vitamin-E                                                                   | C7_14        | Mairin                                                            |
| Group Two   |                                                                             | C7_15        | Suchilactone                                                      |
| C2_1        | (-)-Taxifolin                                                               | Group Eight  |                                                                   |
| C2_2        | Diosmetin                                                                   | C8_1         | Campesterol                                                       |
| C2_3        | Eriodyctiol                                                                 | C8_2         | Campest-5- <i>en</i> -3beta-ol                                    |
| C2_4        | Chryseriol                                                                  | C8_3         | CLR                                                               |
| C2_5        | Ergosta-7,22-dien-3-one                                                     | C8_4         | Cycloartenol                                                      |
| C2_6        | 1-Monolinolein                                                              | C8_5         | Cycloeucaleanol                                                   |
| C2_7        | Linolenic acid ethyl ester                                                  | C8_6         | Ethyl linolenate                                                  |
| C2_8        | Peroxyergosterol                                                            | C8_7         | Ethyl oleate (NF)                                                 |
| C2_9        | Schottenol                                                                  | C8_8         | Glycitein                                                         |
| C2_10       | Diosgenin                                                                   | C8_9         | Spinasterol                                                       |
| C2_11       | Luteolin                                                                    | C8_10        | Mandenol                                                          |
| C2_12       | Genkwanin                                                                   | C8_11        | Sitosterol alpha1                                                 |
| C2_13       | Supraene                                                                    | C8_12        | ZINC03978781                                                      |
| C2_14       | Taxifolin                                                                   | Group Nine   |                                                                   |
| Group Three |                                                                             | C9_1         | Ammidin                                                           |
| C3_1        | 5,7-Dihydroxy-2-(3-hydroxy-4-methoxyphenyl)chroman-4-one                    | C9_2         | Cnidilin                                                          |
| C3_2        | Naringenin                                                                  | C9_3         | Isoimperatorin                                                    |
| C3_3        | Neohesperidin_qt                                                            | C9_4         | Methyl icos-11,14-dienoate                                        |
| C3_4        | Nobiletin                                                                   | C9_5         | Nodakenin                                                         |
| C3_5        | Sinensetin                                                                  | C9_6         | Phellopterin                                                      |
| Group Four  |                                                                             | Group Ten    |                                                                   |
| C4_1        | Areapillin                                                                  | C10_1        | Berberine                                                         |
| C4_2        | Artemetin                                                                   | C10_2        | Coptisine                                                         |
| C4_3        | Isorhamnetin                                                                | C10_3        | Fumarine                                                          |
| C4_4        | Kaempferol                                                                  | C10_4        | Obacunone                                                         |
| C4_5        | Quercetin                                                                   | C10_5        | Palmatine                                                         |
| C4_6        | Skrofulen                                                                   | Group Eleven |                                                                   |
| Group Five  |                                                                             | C11_1        | Aloe-emodin                                                       |
| C5_1        | Baicalein                                                                   | C11_2        | Daucosterol_qt                                                    |
| C5_2        | Baicalin                                                                    | C11_3        | Gallic acid-3- <i>O</i> -(6'- <i>O</i> -galloyl)-glucoside        |
| C5_3        | Oroxylin a                                                                  | Group Twelve |                                                                   |
| C5_4        | Ellagic acid                                                                | C12_1        | 6-(3-Oxoindolin-2-ylidene)indolo[2,1- <i>b</i> ]quinazolin-12-one |
| C5_5        | Gondoic acid                                                                | C12_2        | DFV                                                               |
| C5_6        | Wogonin                                                                     | C12_3        | Acacetin                                                          |
| Group Six   |                                                                             | C12_4        | Dinatin                                                           |
| C6_1        | (+)-Catechin                                                                | C12_5        | Indigo                                                            |
| C6_2        | Benzoyl paeoniflorin                                                        | C12_6        | 24-Ethylcholest-4-en-3-one                                        |
| C6_3        | Paeoniflorin                                                                | C12_7        | Isovitexin                                                        |
| C6_4        | Paeoniflorin_qt                                                             | C12_8        | Linarin                                                           |
| Group Seven |                                                                             | C12_9        | Poriferast-5- <i>en</i> -3beta-ol                                 |
|             |                                                                             | C12_10       | Sinoacutine                                                       |

**Table S7** Ten new formulas developed by unsupervised hierarchical clustering.

| Herb EN                            | Herb CN       | Herb EN                                | Herb CN         |
|------------------------------------|---------------|----------------------------------------|-----------------|
| Formula One                        |               | Formula Five                           |                 |
| Aconiti lateralis radix praeparata | Fu Zi         | Angelicae dahuricae radix              | Bai Zhi         |
| Acori tatarinowii rhizoma          | Shi Chang Pu  | Citri reticulatae pericarpium          | Chen Pi         |
| Armeniaca semen amarum             | Ku Xing Ren   | Magnoliae officinalis cortex           | Hou Po          |
| Asteris radix et rhizoma           | Zi Wan        | Perillae folium                        | Zi Su Ye        |
| Aurantii fructus immaturus         | Zhi Shi       | Pinelliae rhizoma                      | Ban Xia         |
| Belamcandae rhizoma                | She Gan       | Pogostemon cablin                      | Guang Huo Xiang |
| Chrysanthemi flos                  | Ju Hua        | Poria                                  | Fu Ling         |
| Corni fructus                      | Shan Zhu Yu   | Formula Six                            |                 |
| Dioscoreae rhizoma                 | Shan Yao      | Angelicae sinensis radix               | Dang Gui        |
| Ephedrae herba                     | Ma Huang      | Aurantii fructus                       | Zhi Ke          |
| Eupatorii herba                    | Pei Lan       | Bupleuri radix                         | Chai Hu         |
| Fritillariae thunbergii bulbus     | Zhe Bei Mu    | Carthamus tinctorius                   | Hong Hua        |
| Ginseng radix et rhizoma           | Ren Shen      | Chuanxiong rhizoma                     | Chuan Xiong     |
| Isatidis folium                    | Da Qing Ye    | Fritillariae cirrhosae bulbus          | Chuan Bei Mu    |
| Mori cortex                        | Sang Bai Pi   | Ginseng radix et rhizoma rubra         | Hong Shen       |
| Mori folium                        | Sang Ye       | Paeoniae radix rubra                   | Chi Shao        |
| Formula Two                        |               | Peucedani radix                        | Qian Hu         |
| Alismatis rhizoma                  | Ze Xie        | Platycodonis radix                     | Jie Geng        |
| Amomi fructus rotundus             | Dou Kou       | Puerariae lobatae radix                | Ge Gen          |
| Coicis semen                       | Yi Yi Ren     | Salviae miltiorrhizae radix et rhizoma | Dan Shen        |
| Curcumae longae rhizoma            | Jiang Huang   | Schizonepetae herba                    | Jing Jie        |
| Polyporus                          | Zhu Ling      | Formula Seven                          |                 |
| Sojae semen praeparatum            | Dan Dou Chi   | Arctii fructus                         | Niu Bang Zi     |
| Tetrapanax medulia                 | Tong Cao      | Codonopsis radix                       | Dang Shen       |
| Formula Three                      |               | Forsythiae fructus                     | Lian Qiao       |
| Amomi fructus                      | Sha Ren       | Glycyrrhizae radix et rhizoma          | Gan Cao         |
| Descurainiae semen lepidii semen   | Ting Li Zi    | Lophatheri herba                       | Dan Zhu Ye      |
| Lablab semen album                 | Bai Bian Dou  | Menthae haplocalycis herba             | Bo He           |
| Persicae semen                     | Tao Ren       | Phragmitis rhizoma                     | Lu Hui          |
| Rhei radix et rhizoma              | Da Huang      | Formula Eight                          |                 |
| Trichosanthis fructus              | Gua Lou       | Arecae semen                           | Bing Lang       |
| Formula Four                       |               | Atractylodis rhizoma                   | Cang Zhu        |
| Anemarrhenae rhizoma               | Zhi Mu        | Lonicerae japonicae flos               | Jin Yin Hua     |
| Aquilariae lignum resinatum        | Chen Xiang    | Notopterygii rhizoma et radix          | Qiang Huo       |
| Aucklandiae radix                  | Mu Xiang      | Tsaoko fructus                         | Cao Guo         |
| Benzoinum                          | An Xi Xiang   | Zingiberis rhizoma recens              | Sheng Jiang     |
| Caryophylli flos                   | Ding Xiang    | Formula Nine                           |                 |
| Chebulae fructus                   | Ke Zi         | Artemisiae annuae herba                | Qing Hao        |
| Cimicifugae rhizoma                | Sheng Ma      | Cinnamomi ramulus                      | Gui Zhi         |
| Coptidis rhizoma                   | Huang Lian    | Cyrtomium fortunei                     | Guan Zhong      |
| Curcumae radix                     | Yu Jin        | Glehniae radix                         | Bei Sha Shen    |
| Cyperi rhizoma                     | Xiang Fu      | Houttuyniae herba                      | Yu Xing Cao     |
| Gardeniae fructus                  | Zhi Zi        | Isatidis radix                         | Ban Lan Gen     |
| Liquidambar                        | Su He Xiang   | Jujubae fructus                        | Da Zao          |
| Moutan cortex                      | Mu Dan Pi     | Ophiopogonis radix                     | Mai Dong        |
| Olibanum                           | Ru Xiang      | Panacis quinquefolii radix             | Xi Yang Shen    |
| Paeoniae radix alba                | Bai Shao      | Rhodiola crenulatae radix et rhizoma   | Hong Jing Tian  |
| Piperis longi fructus              | Bi Ba         | Schisandrae chinensis fructus          | Wu Wei Zi       |
| Rehmanniae radix                   | Di Huang      | Formula Ten                            |                 |
| Sabia schumanniana                 | Qing Mu Xiang | Astragali radix                        | Huang Qi        |
| Santalum album                     | Chan Xiang    | Atractylodis macrocephalae rhizoma     | Bai Zhu         |
| Scrophulariae radix                | Xuan Shen     | Pseudostellariae radix                 | Tai Zi Shen     |
| Scutellariae radix                 | Huang Qin     | Saposhnikovia radix                    | Fang Feng       |

**Table S8** List of eight clusters and corresponding active pharmacophores.

| Mod ID     | Cluster structure                                                                                                                                                    | Basic ring system                                                                                            |
|------------|----------------------------------------------------------------------------------------------------------------------------------------------------------------------|--------------------------------------------------------------------------------------------------------------|
| MOL0 13094 | 8-(2,3-Dihydroxy-3-methylbutyl)-5,7-dimethoxy-2 <i>H</i> -chromen-2-one                                                                                              | 2 <i>H</i> -Chromen-2-one                                                                                    |
| MOL0 13287 | (3 <i>aR</i> ,8 <i>aR</i> )-3 <i>a</i> ,8-Dimethyl-3,3 <i>a</i> ,8,8 <i>a</i> -tetrahydro-2 <i>H</i> -furo[2,3- <i>b</i> ]indol-5-yl methylcarbamate                 | 3,3 <i>a</i> ,8,8 <i>a</i> -Tetrahydro-2 <i>H</i> -furo[2,3- <i>b</i> ]indole                                |
| MOL0 13117 | (2 <i>S</i> ,4 <i>R</i> )-4,7-Dihydroxy-5-methoxy-6-methyl-2-phenyl-8-chromanecarbaldehyde                                                                           | 2-Phenylchromane                                                                                             |
| MOL0 12893 | ( <i>E</i> )-1-(4-Methylphenyl)- <i>N</i> -(4-phenyl-1 <i>H</i> -1,2,3-triazol-1-yl)methanimine                                                                      | ( <i>E</i> )-1-Phenyl- <i>N</i> -(4-phenyl-1 <i>H</i> -1,2,3-triazol-1-yl)methanimine                        |
| MOL0 12933 | (13 <i>aR</i> ,14 <i>R</i> )-3,7-Dimethoxy-9,11,12,13,13 <i>a</i> ,14-hexahydrodibenzo[ <i>f,h</i> ]pyrrolo[1,2- <i>b</i> ]isoquinolin-6,14-diol                     | 9,11,12,13,13 <i>a</i> ,14-Hexahydrodibenzo[ <i>f,h</i> ]pyrrolo[1,2- <i>b</i> ]isoquinoline                 |
| MOL0 13081 | 7,13-Dimethyl-5,6,7,13-tetrahydro-7,11,13 <i>a</i> -triazabenz[5,6]cyclohepta[1,2,3- <i>jk</i> ]fluorene                                                             | 1,2,3,8-Tetrahydro-1,7 <i>b</i> ,10-triazabenz[5,6]cyclohepta[1,2,3- <i>jk</i> ]fluorene                     |
| MOL0 13187 | (2 <i>S</i> ,3 <i>R</i> ,4 <i>R</i> )-3,4-Bis(1,3-benzodioxol-5-ylmethyl)tetrahydro-2-furanol                                                                        | 5,5'-[(3 <i>R</i> ,4 <i>R</i> )-Tetrahydrofuran-3,4-diylbis(methylene)]bis(1,3-benzodioxole)                 |
| MOL0 13037 | 2-(2-Phenylethyl)-6-[[[(6 <i>R</i> ,7 <i>R</i> )-5,6,7-trihydroxy-4-oxo-2-(2-phenylethyl)-5,6,7,8-tetrahydro-4 <i>H</i> -chromen-8-yl]oxy]-4 <i>H</i> -chromen-4-one | 6-((4-Oxo-2-phenethyl-5,6,7,8-tetrahydro-4 <i>H</i> -chromen-8-yl)oxy)-2-phenethyl-4 <i>H</i> -chromen-4-one |

**Table S9** Number of 22 chemical structures.

| No. | Structure                                                                           | Ring system | No. | Structure                                                                           | Ring system                                                                                   |
|-----|-------------------------------------------------------------------------------------|-------------|-----|-------------------------------------------------------------------------------------|-----------------------------------------------------------------------------------------------|
| 1   | 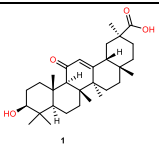 |             | 12  |  | <br>12.2 |
| 2   |  |             | 13  |  |                                                                                               |
| 3   |  |             | 14  |  |                                                                                               |
| 4   |  |             | 15  |  | <br>15.2 |
| 5   |  |             | 16  |  | <br>16.2 |



6

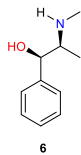

7

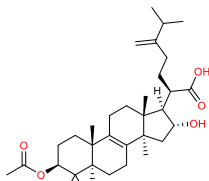

8

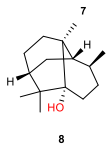

9

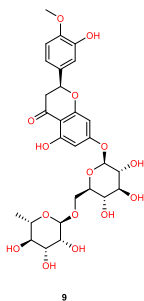

10

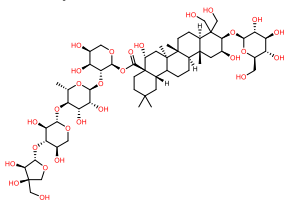

11

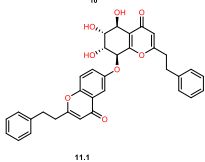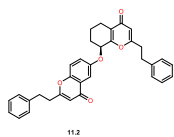

17

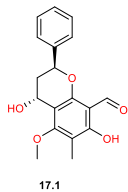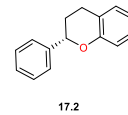

18

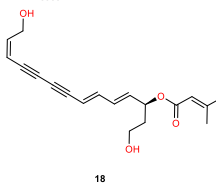

19

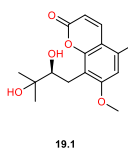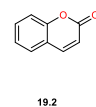

20

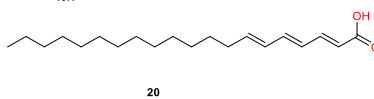

21

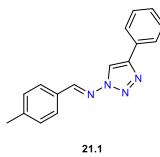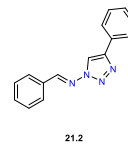

22

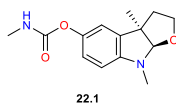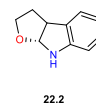

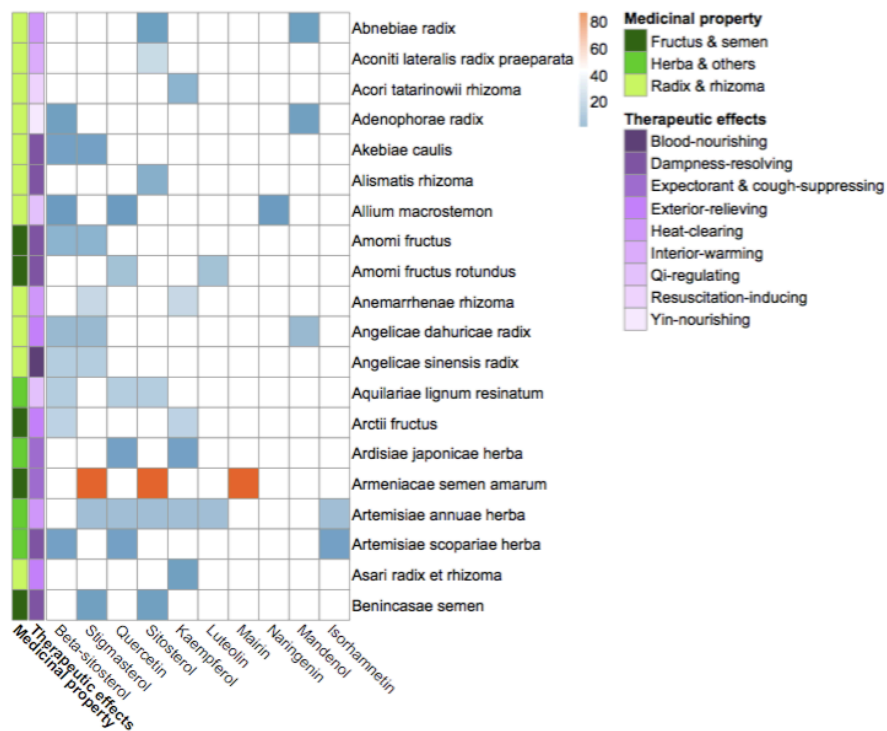

**Figure S1** Heat map of the frequency of top 10 frequently appeared chemical components in top 20 frequently utilized herbs. Among the top 20 most frequently utilized herbal medicines containing top ten most frequently appeared components showing in the heat map, five of them belong to fructus & semen, 11 are applied by radix & rhizome, four are herba & others. While six of them belong to dampness-resolving class, three are antipyretic and another three are exterior-relieving, two are expectorant & cough-suppressing and another two Qi-regulating, one blood-nourishing, one interior-warming, one Yin-nourishing, and one resuscitation-inducing.
